# Supplementary material for: The G Protein–Coupled Receptor Subset of the Chicken Genome
Source: PLOS journal article supplement (doi:10.1371/journal.pcbi.0020054), 2006-05-30
Supplement: S1 (10.1371/journal.pcbi.0020054.s001) [file journal.pcbi.0020054.s001]

**Supplementary table I.**

Summary of the process of identification of chicken GPCRs and in which step receptors from the respective groups were identified.

|                                                     | Known | Step 1 | Step 2 | Step 3 | Step 4 | Total |
|-----------------------------------------------------|-------|--------|--------|--------|--------|-------|
| <i>Adhesion</i>                                     | 0     | 16     | 1      | 0      | 5      | 22    |
| <i>Frizzled</i>                                     | 9     | 2      | 0      | 0      | 0      | 11    |
| <i>Glutamate</i>                                    | 1     | 9      | 3      | 2      | 0      | 15    |
| <i>Rhodopsin (<math>\alpha</math>)</i>              | 25    | 51     | 7      | 6      | 3      | 92    |
| <i>Rhodopsin (<math>\beta</math>)</i>               | 25    | 14     | 5      | 1      | 0      | 45    |
| <i>Rhodopsin (<math>\gamma</math>)</i>              | 17    | 22     | 3      | 4      | 0      | 46    |
| <i>Rhodopsin (<math>\delta</math> No Olfactory)</i> | 10    | 35     | 6      | 6      | 4      | 61    |
| <i>Rhodopsin (Olfactory)</i>                        | 8     | 221    | 0      | 0      | 0      | 229   |
| <i>Secretin</i>                                     | 4     | 9      | 0      | 1      | 0      | 14    |
| <i>Taste 2</i>                                      | 0     | 1      | 0      | 0      | 2      | 3     |
| <i>Other</i>                                        | 3     | 10     | 0      | 2      | 4      | 19    |
|                                                     |       |        |        |        |        |       |
| Total                                               | 102   | 390    | 25     | 22     | 18     | 557   |
